# Supplementary material for: Analysis of Hydrological Dynamics and Climate Change Impact in the Chuncheon Watershed with the SWAT Model
Source: Research Square preprint supplement (doi:10.21203/rs.3.rs-4239268/v1), 2024-04-12
Supplement: Supplementary file 1 [file 1c5d6486f3eb49c1b51a958b.docx]

Table S1. Summary of SWAT-Simulated Mean Annual Values Across 52 Subbasins in the Chuncheon Watershed

The Supplementary Information (SI) contains thorough data for multiple water quality parameters in the Chuncheon watershed, providing insights into environmental health throughout subbasins. Subbasin 36 appears as a focal point, with a sediment load of 110.99 tons, indicating possible water quality issues. Furthermore, Subbasins 33 and 31 have high sedimentation, with 80.02 and 79.18 tons, respectively, necessitating further investigation.
Besides sediment, organic nitrogen, phosphorus, and nitrate concentrations are highlighted, providing insight into nutrient contamination. Notably, Subbasins 21, 26, and 31 have increased nutrient levels, which could contribute to eutrophication and impaired aquatic environment. Dissolved oxygen levels, which are critical for aquatic life, vary among subbasins, with Subbasins 36 and 37 having much lower levels, indicating possible hypoxic conditions.

The details for this supplemental information are available in the "Spatial Distribution Maps of Water Quality Parameters" section.

Table S1. Summary of SWAT-Simulated Mean Annual Values Across 52 Subbasins in the Chuncheon Watershed

| **Subbasin** | **Sediment (tons)** | **Org. Nitrogen (kg)** | **Org. Phosphorus (kg)** | **(NO3) Nitrate (kg)** | **Dissolved Oxygen (kg)** |
| --- | --- | --- | --- | --- | --- |
| 1 | 2.294 | 11.18 | 2.81 | 1.85 | 182.017 |
| 2 | 0.94 | 4.26 | 1.16 | 2.85 | 695.94 |
| 3 | 1.53 | 6.59 | 1.67 | 1.5 | 165.18 |
| 4 | 20.9 | 47.3 | 11.8 | 11.7 | 956.3 |
| 5 | 15.02 | 39.79 | 9.95 | 9.91 | 788.7 |
| 6 | 0.86 | 3.61 | 0.91 | 1.1 | 109.5 |
| 7 | 5.39 | 22.46 | 5.63 | 5.62 | 442.6 |
| 8 | 4.19 | 17.39 | 4.37 | 4.22 | 364.41 |
| 9 | 0.4 | 1.75 | 0.48 | 0.99 | 289.65 |
| 10 | 0.398 | 1.763 | 0.48 | 1.14 | 317.62 |
| 11 | 1.89 | 5.58 | 1.97 | 2.71 | 304.59 |
| 12 | 66.21 | 73.15 | 18.52 | 16.99 | 1289.11 |
| 13 | 10.56 | 45.3 | 11.32 | 10.95 | 882.88 |
| 14 | 4.12 | 17.31 | 4.35 | 3.96 | 352.77 |
| 15 | 0.23 | 1.01 | 0.28 | 0.69 | 172.94 |
| 16 | 1.36 | 6.33 | 1.57 | 1.903 | 294.06 |
| 17 | 25.57 | 53.9 | 9.035 | 12.494 | 384.85 |
| 18 | 7.08 | 16.067 | 4.73 | 3.03 | 148.53 |
| 19 | 5.99 | 0.0005 | 0.0002 | 0.0077 | 1.14 |
| 20 | 2.4 | 9.68 | 2.66 | 3.15 | 325.6 |
| 21 | 50.76 | **102.032** | 21.56 | 24.69 | 1844.6 |
| 22 | 7.92 | 30.24 | 7.417 | 8.61 | 250.69 |
| 23 | 2.48 | 10.85 | 2.73 | 2.74 | 283.26 |
| 24 | 46.57 | 115.29 | 25.24 | 32.3 | 1630 |
| 25 | 9.11 | 25.02 | 6.2 | 3.68 | 246.18 |
| 26 | 70.68 | 212.45 | 51.9 | 60.41 | 2331.36 |
| 27 | 5.999 | 25.49 | 6.41 | 5.84 | 519.44 |
| 28 | 38.95 | 82.1 | 22.6 | 24.9 | 682.93 |
| 29 | 13.58 | 18.4 | 5.66 | 3.94 | 161.87 |
| 30 | 2.33 | 4.52 | 1.66 | 1.79 | 374.75 |
| **31** | **79.18** | **237.63** | **57.95** | **64.84** | **2398.59** |
| 32 | 16.32 | 24.74 | 7.25 | 5.28 | 210.27 |
| **33** | **80.02** | **238.37** | **58.22** | **64.95** | **2397.47** |
| 34 | 1.47 | 1.72 | 0.88 | 0.74 | 259.1 |
| 35 | 1.05 | 3.17 | 0.98 | 1.44 | 362.88 |
| 36 | **110.99** | **285.83** | 72.72 | 74.71 | 3648.48 |
| 37 | 96.93 | **276.49** | 70.02 | 71.88 | 3245.25 |
| 38 | 1.67 | 2.057 | 0.98 | 0.79 | 201.202 |
| 39 | 2.67 | 9.34 | 2.599 | 2.33 | 470.79 |
| 40 | 9.7 | 31.37 | 8.93 | 6 | 928.25 |
| 41 | 2.18 | 2.42 | 1.24 | 1.21 | 365.87 |
| 42 | 36.38 | 34.9 | 9.85 | 52.79 | 2004.87 |
| 43 | 2.2 | 5.93 | 1.88 | 1.86 | 381.79 |
| 44 | 44.42 | 37.78 | 11.36 | 54.34 | 2454.49 |
| 45 | 0.31 | 1.48 | 0.39 | 0.8 | 243.18 |
| 46 | 0.81 | 4.06 | 1.01 | 0.96 | 271.11 |
| 47 | 19.4 | 24.44 | 7.1 | 5.39 | 623.85 |
| 48 | 4.12 | 15.19 | 4.12 | 3.37 | 698.61 |
| 49 | 0.35 | 1.04 | 0.33 | 7.43 | 354.22 |
| 50 | 0.19 | 0.35 | 0.14 | 4.13 | 191.6 |
| 51 | 27.78 | 29.24 | 8.13 | 50.9 | 1797.63 |
| 52 | 15.82 | 29.23 | 8.2 | 37.73 | 1731.64 |
